# Supplementary material
Source: Springer Nature journal article supplement (https://www.springermedizin.de/resource/supplementary/13063_2011_1101_MOESM2_ESM.pdf/9619650)
Supplement: MOESM2 [file 9619650]

|                                                         |
|---------------------------------------------------------|
| <b>Questionnaire</b>                                    |
| Checklist Individual Strength (CIS)                     |
| Short Form 36 (SF-36)                                   |
| EuroQol- 5D (EQ-5D)                                     |
| Symptom Check List-90 (SCL-90)                          |
| Self-Efficacy Scale-28 (SES 28)                         |
| Causal Attribution List (CAL)                           |
| Mindfulness Attention Awareness Scale (MAAS)            |
| Sickness Impact Profile-8 (SIP-8)                       |
| Life Satisfaction Questionnaire, Dutch Version (LSQ-DV) |
